# Supplementary material for: Cyclanilide Induces Lateral Bud Outgrowth by Modulating Cytokinin Biosynthesis and Signalling Pathways in Apple Identified via Transcriptome Analysis
Source: MDPI journal article supplement (doi:10.3390/ijms23020581), 2022-01-06
Supplement: s1 [file s1]

| Gene name      | Gene locus   | CT24    |        | Cyc24   |         | CT168   |         | Cyc168  |        |
|----------------|--------------|---------|--------|---------|---------|---------|---------|---------|--------|
|                |              | RNA-seq | qPCR   | RNA-seq | qPCR    | RNA-seq | qPCR    | RNA-seq | qPCR   |
| <i>MdCYCD3</i> | MD15G1077100 | 4.83    | 1      | 2.96    | 5.57    | 2.22    | 17.92   | 5.07    | 7.32   |
| <i>MdABI2</i>  | MD02G1084600 | 7.41    | 5.79   | 12.92   | 9.59    | 14.54   | 30.99   | 4.99    | 7.62   |
| <i>MdTCH4</i>  | MD13G1268900 | 3.72    | 12.88  | 3.20    | 11.03   | 8.63    | 26.63   | 3.08    | 7.90   |
| <i>MdPP2C</i>  | MD07G1291000 | 5.96    | 0.17   | 8.53    | 1.06    | 9.06    | 1.46    | 3.91    | 0.99   |
| <i>MdAHP1</i>  | MD12G1226800 | 185.34  | 650.97 | 286.59  | 2929.61 | 107.59  | 2929.61 | 86.75   | 465.43 |
