# Supplementary material for: Cyclanilide Induces Lateral Bud Outgrowth by Modulating Cytokinin Biosynthesis and Signalling Pathways in Apple Identified via Transcriptome Analysis
Source: MDPI journal article supplement (doi:10.3390/ijms23020581), 2022-01-06
Supplement: s1 [file s1]

| sample   | clean_reads | Q30   | unique_map       |
|----------|-------------|-------|------------------|
| Y0_1     | 43138052    | 93.47 | 38751407(89.83%) |
| Y0_2     | 44261848    | 93.92 | 40001261(90.37%) |
| Y0_3     | 43101352    | 93.76 | 38798032(90.02%) |
| CT24_1   | 44169246    | 93.79 | 39877337(90.28%) |
| CT24_2   | 45813952    | 93.31 | 41419384(90.41%) |
| CT24_3   | 41927590    | 93.98 | 37929298(90.46%) |
| CYC24_1  | 43654872    | 93.66 | 39421676(90.3%)  |
| CYC24_2  | 42451212    | 93    | 38345321(90.33%) |
| CYC24_3  | 42495302    | 93.71 | 38414928(90.4%)  |
| CT168_1  | 44955050    | 93.65 | 40580851(90.27%) |
| CT168_2  | 43025940    | 93.58 | 38878452(90.36%) |
| CT168_3  | 44053172    | 93.85 | 39578634(89.84%) |
| CYC168_1 | 40611590    | 93.52 | 36634822(90.21%) |
| CYC168_2 | 40757694    | 93.67 | 36666236(89.96%) |
| CYC168_3 | 43876572    | 93.76 | 39535547(90.11%) |
