# Supplementary material for: Cyclanilide Induces Lateral Bud Outgrowth by Modulating Cytokinin Biosynthesis and Signalling Pathways in Apple Identified via Transcriptome Analysis
Source: MDPI journal article supplement (doi:10.3390/ijms23020581), 2022-01-06
Supplement: s1 [file s1]

| Gene name        | GeneID       | Primer sequence (5'-3', F, R)                  |
|------------------|--------------|------------------------------------------------|
| <i>BRC1</i>      | MD06G1211100 | AGCCCAGCAAAACCGTGGAGT<br>TGGAGCCTCATCGACGCCTG  |
| <i>MdCYCD3</i>   | MD15G1077100 | TGCCAAAGTTGAGGAGACCC<br>TAGGGTTCTGGTTGAGCTTCC  |
| <i>MdABI2</i>    | MD02G1084600 | GGATTTAGCTCAGGCAGTTGCT<br>TTTGAACCGGAACCTGCGAG |
| <i>MdTCH4</i>    | MD13G1268900 | TACTTGCGCTCAGAAGGGTC<br>GGTCGCCACTAAGATTCCCC   |
| <i>MdPP2C</i>    | MD07G1291000 | GGGTACGGCGTTGTATCATT<br>ACACGGTTTCCGTTCCAAGT   |
| <i>MdAHP1</i>    | MD12G1226800 | AACGTCGAAGGGTGCGTAAAA<br>CCTTGGAAGCGAACTGCCG   |
| <i>HistoneH3</i> | MD15G1320600 | ATGGCCCGTACCAAGCAA<br>CGGATTTCACGAAGAGCAAC     |
